# Supplementary material
Source: Springer Nature journal article supplement (https://www.springermedizin.de/resource/supplementary/13012_2012_566_MOESM2_ESM.pdf/9629990)
Supplement: MOESM2 [file 9629990]

Triage

Management

Your patient may have suffered from a TIA and the estimated seven day **stroke risk** is Low

You have two management options:

a) Refer to [TIA Clinic](#) AND (before patient leaves surgery):

Initiate/continue ALL of the following Medications:

[Clopidogrel](#) OR [Aspirin](#) +/- [Dipyridamole](#) (UNLESS patient is on [Warfarin](#) or [Dabigatran](#))

AND

[Statin](#) AND [Antihypertensive](#)

AND

Counsel patient on [Smoking Cessation](#) AND No [Driving](#) for minimum of 1 month.

[Print TIA Information Leaflet](#)

OR

b) Arrange comprehensive TIA/stroke work-up in the community (see 'Management' tab).

Clicking or hovering over blue links or an  opens a pop-up window with added information for the user and/or generates referrals, prescription or patient leaflets

Triage

Management

**ATTENTION:** Please ensure that all referrals and prescriptions are appropriate and correct prior to handing them to the patient - this software is intended as a tool to support, but not replace practitioner clinical judgement.
